# Supplementary material for: Viral expression associated with gastrointestinal adenocarcinomas in TCGA high-throughput sequencing data
Source: PubMed Central journal article supplement (PMC3906926; doi:10.1186/1479-7364-7-23), 2013-11-27

EBV, NC\_007605

Transcriptome

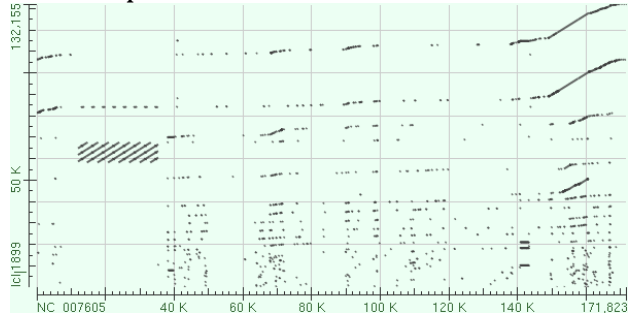

Genome

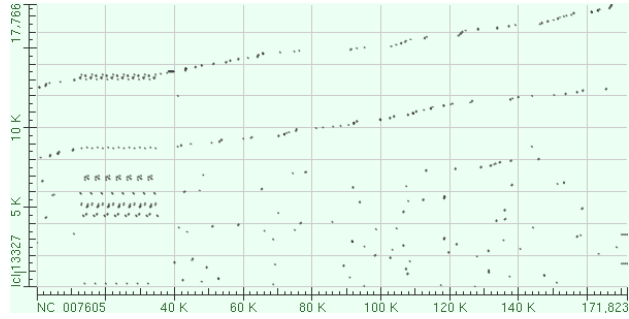

HHV-6B, NC\_000898

Transcriptome

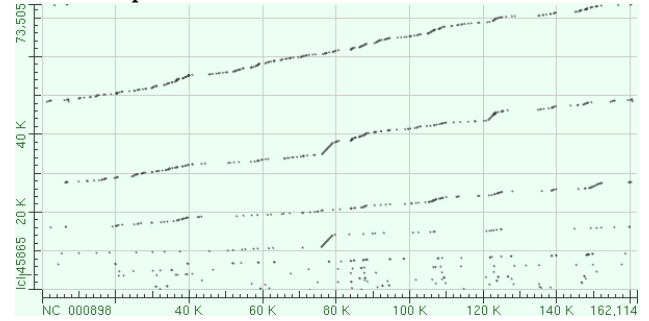

Genome

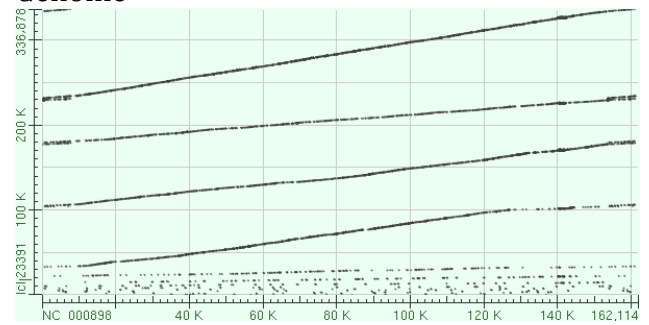

CMV, NC\_006273

Transcriptome

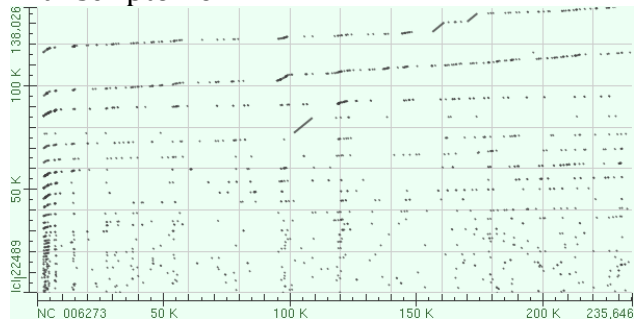

Genome

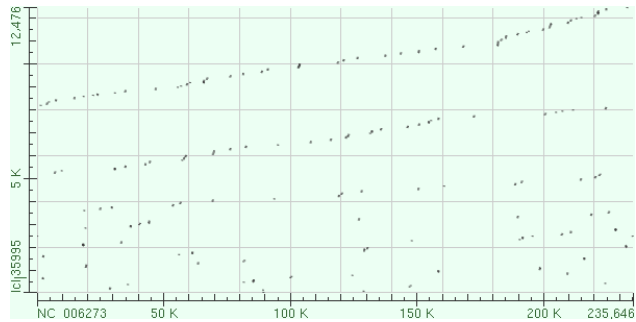

KSHV, NC\_009333

Transcriptome

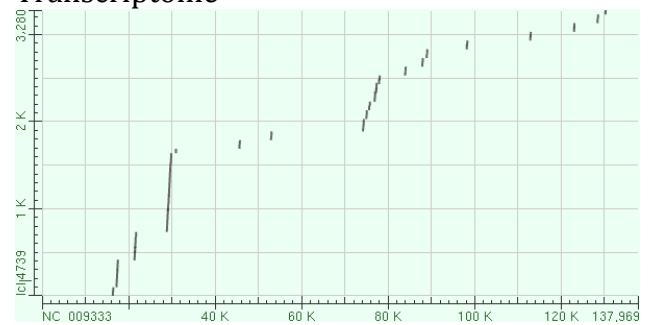

HPV-18, NC\_001357

Transcriptome

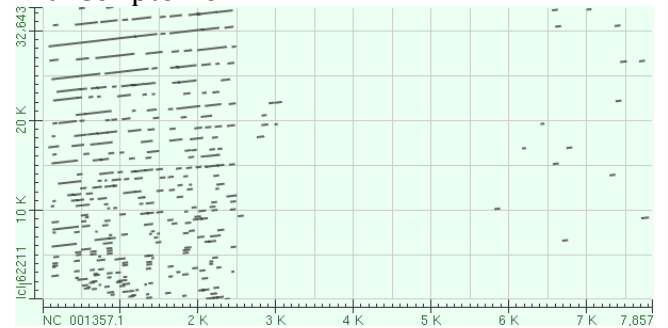

Supplement: 1479-7364-7-23-S2.pdf [file 1479-7364-7-23-S2.pdf]
