# Supplementary material for: Viral expression associated with gastrointestinal adenocarcinomas in TCGA high-throughput sequencing data
Source: PubMed Central journal article supplement (PMC3906926; doi:10.1186/1479-7364-7-23), 2013-11-27

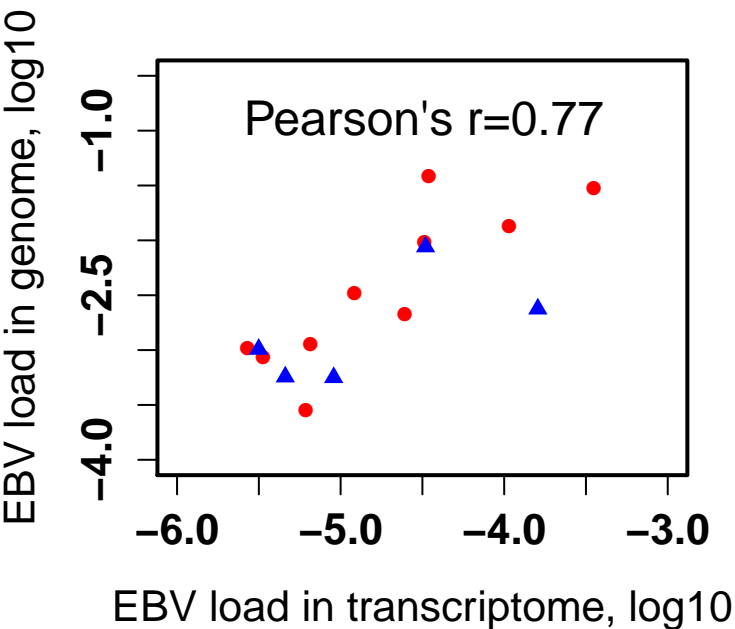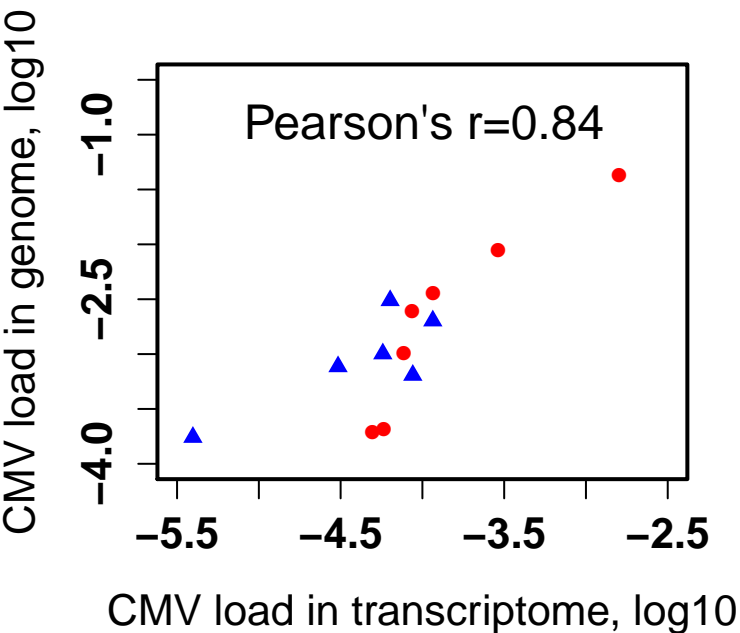

Supplement: 1479-7364-7-23-S3.pdf [file 1479-7364-7-23-S3.pdf]
