# Supplementary material for: Viral expression associated with gastrointestinal adenocarcinomas in TCGA high-throughput sequencing data
Source: PubMed Central journal article supplement (PMC3906926; doi:10.1186/1479-7364-7-23), 2013-11-27

**BWA**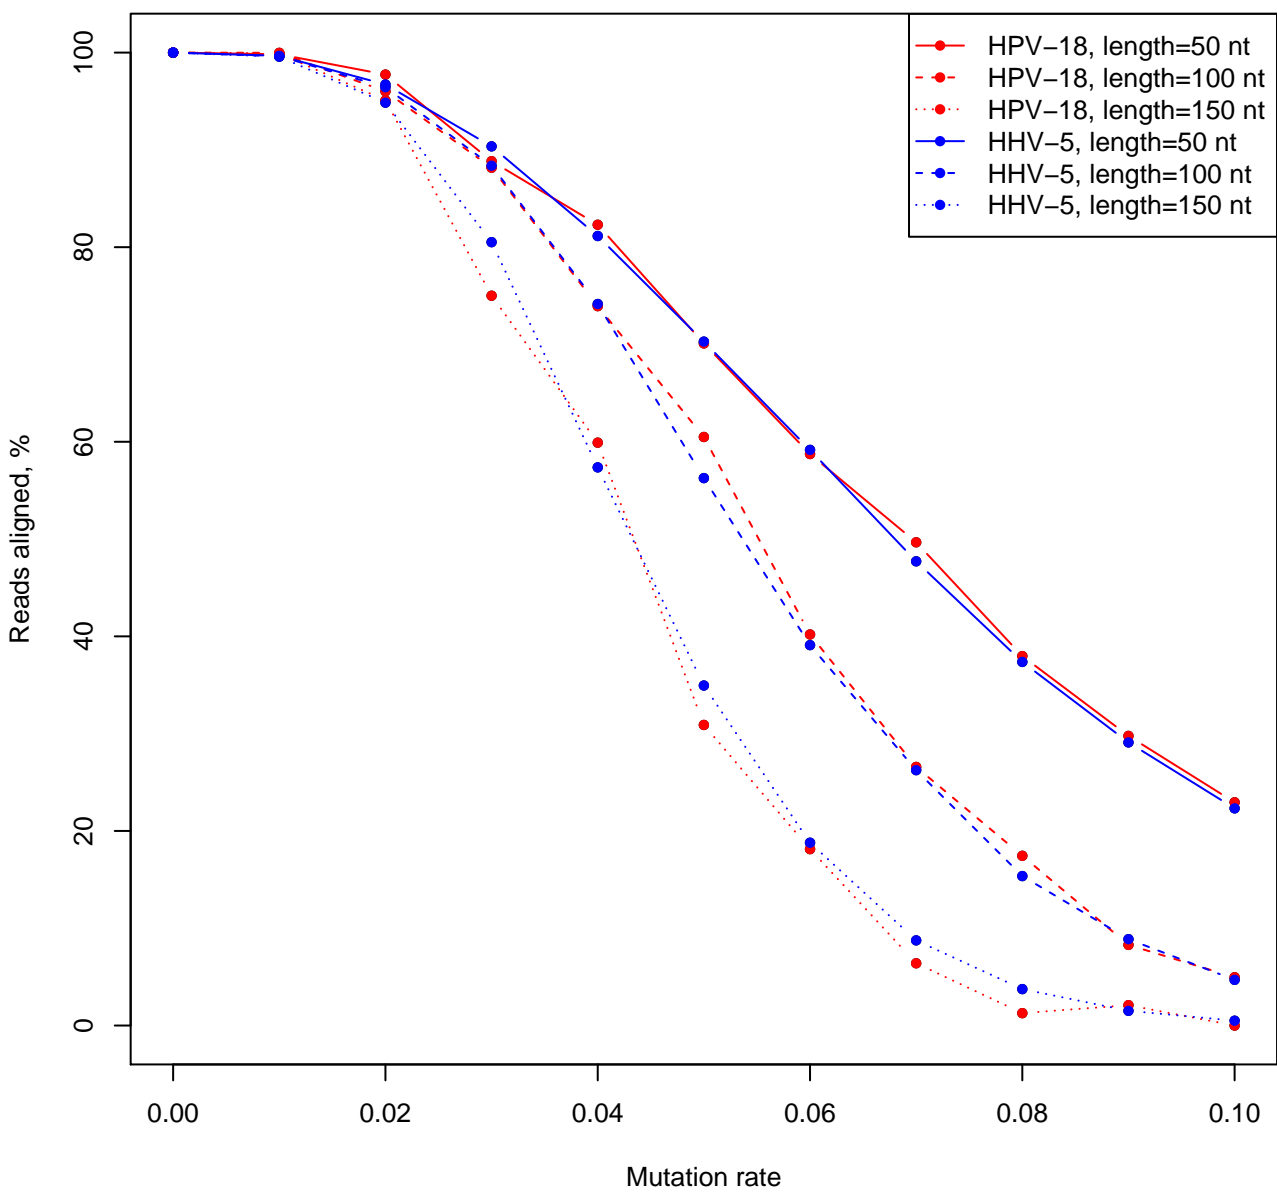**BWA**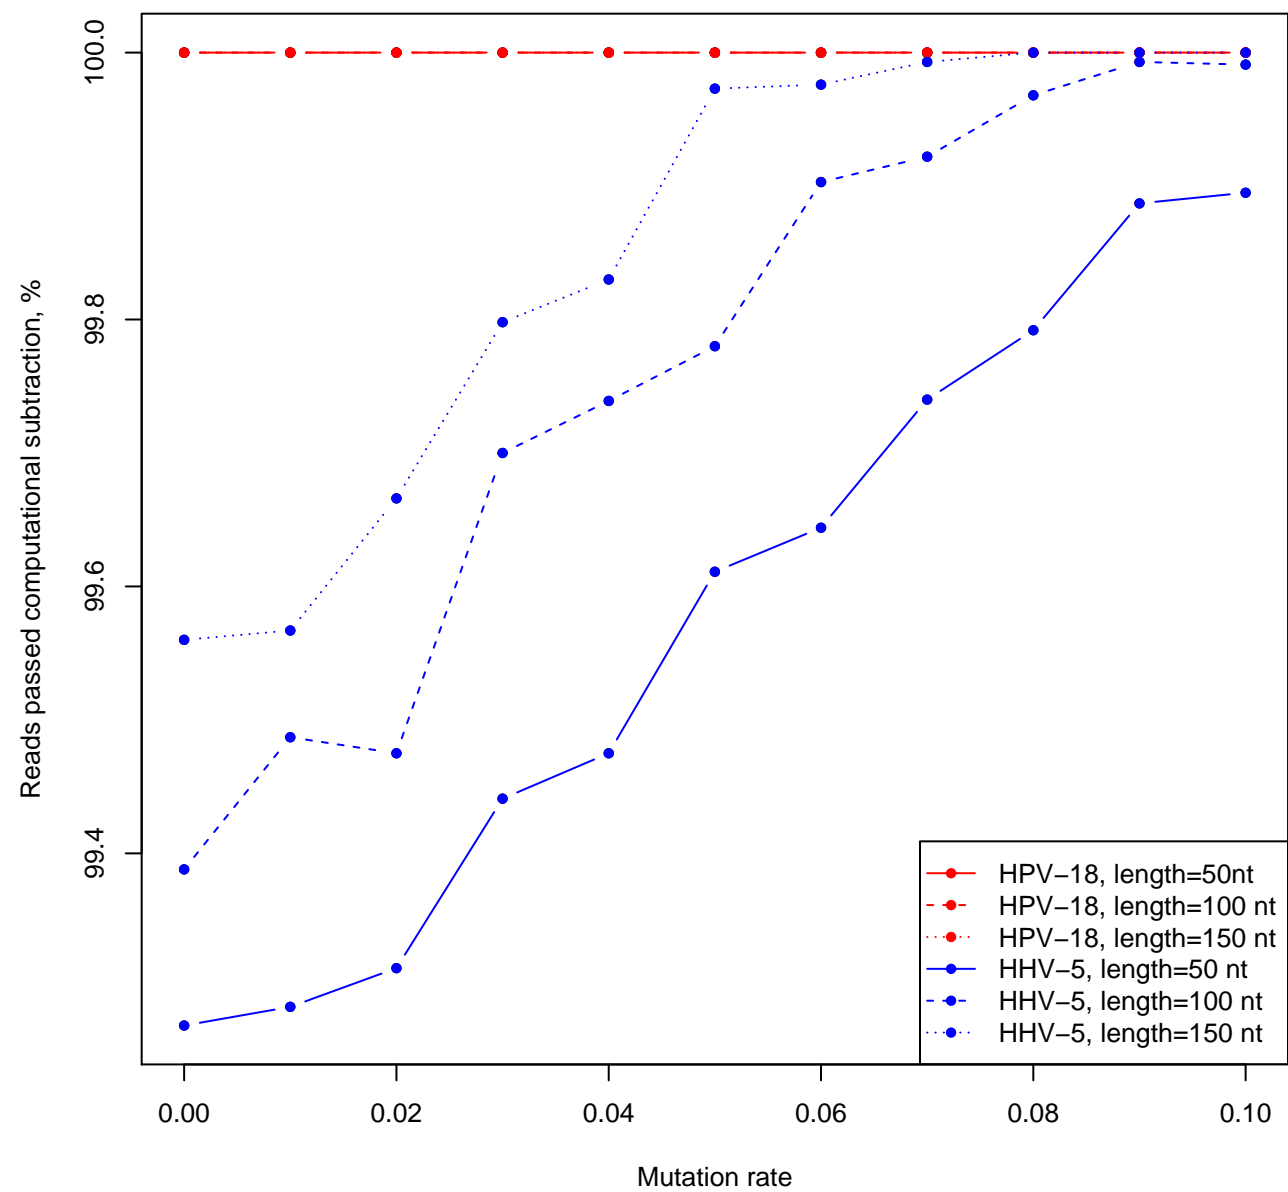**TopHat**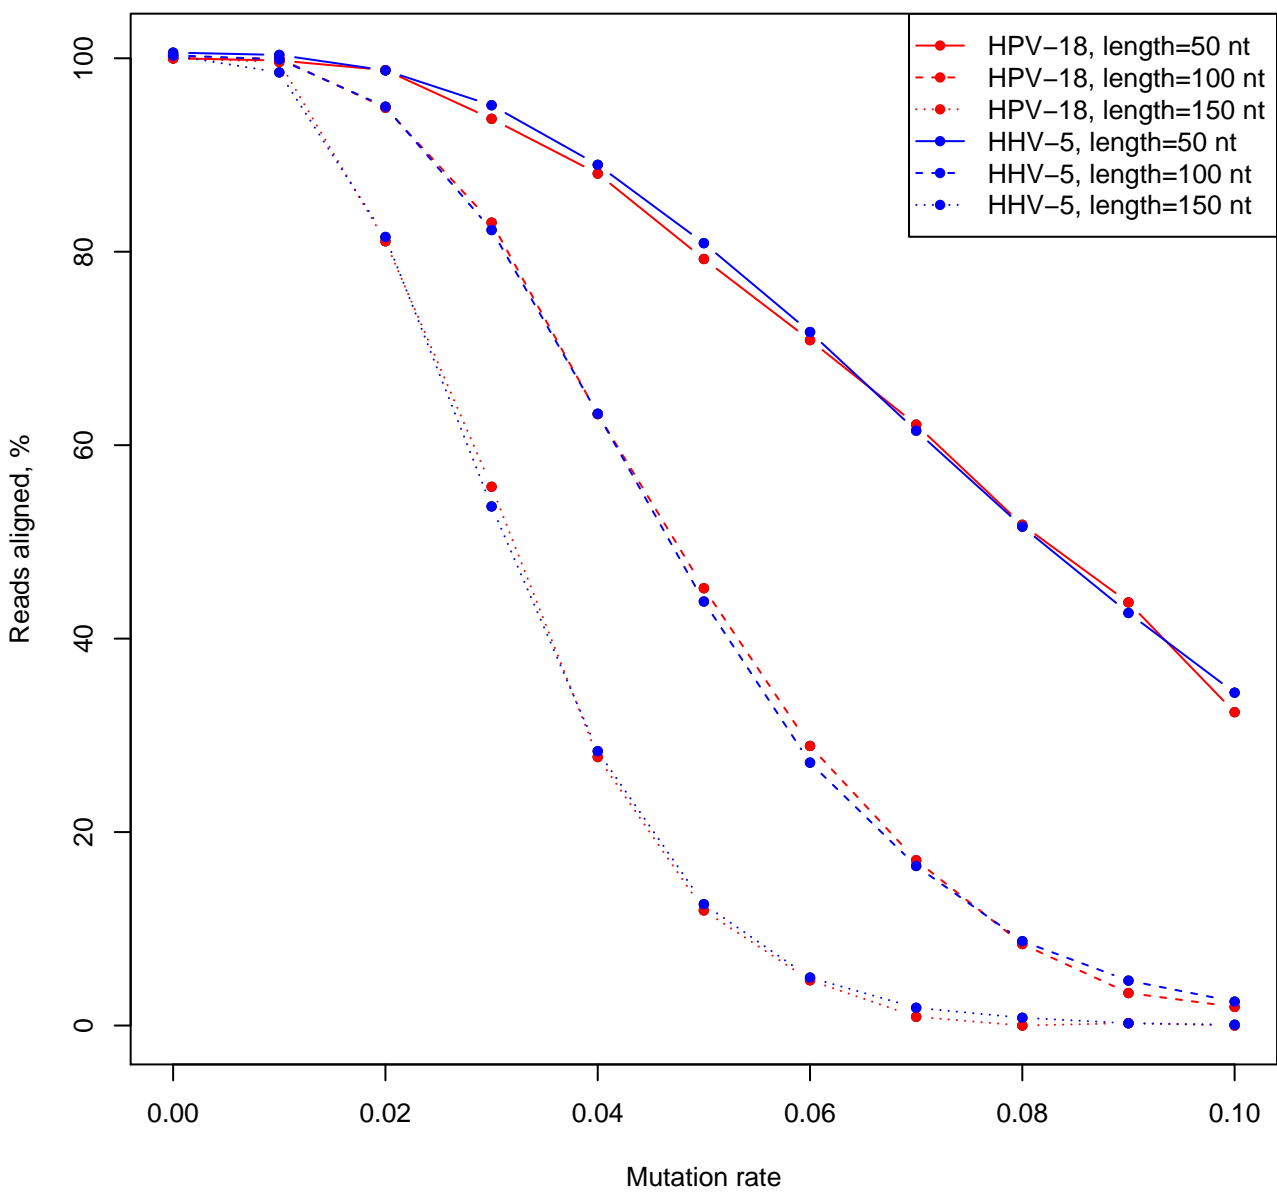**TopHat**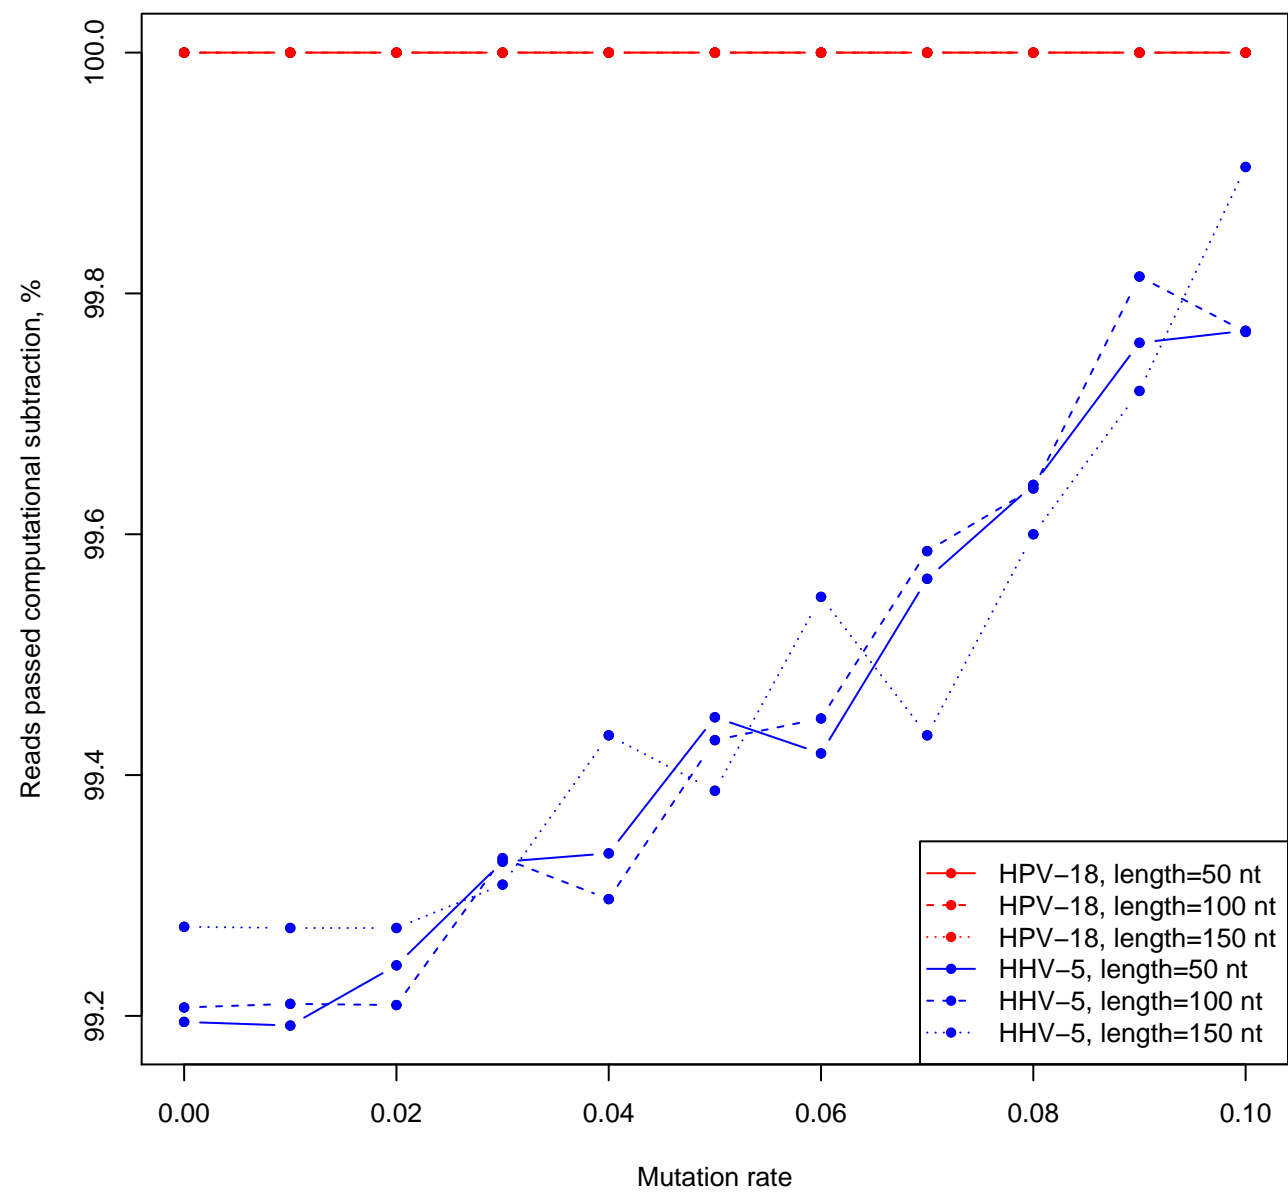

Supplement: 1479-7364-7-23-S4.pdf [file 1479-7364-7-23-S4.pdf]
